# Supplementary material for: An artificial TiO2/lithium n-butoxide hybrid SEI layer with facilitated lithium-ion transportation ability for stable lithium anodes
Source: Royal Society of Chemistry journal article supplement (doi:10.1039/c8nr08060g), 2019-01-01
Supplement: c8nr08060g1.pdf [file c8nr08060g1.pdf]

## Supplementary Information

### **An Artificial TiO<sub>2</sub>/Lithium n-Butoxide Hybrids SEI Layer with Facilitated Lithium-ion Transportation Ability for Stable Lithium Anode**

*Yang Nan, Songmei Li\*, Bin Li\*, Shubin Yang*

Dr. Y. Nan, Prof. S. M. Li, Dr. B. Li, Prof. S. B. Yang

Key Laboratory of Aerospace Advanced Materials and Performance of Ministry of  
Education, School of Materials Science & Engineering

Beihang University

Beijing, 100191, China

\*E-mail: Songmei\_li@buaa.edu.cn, li\_bin@buaa.edu.cn

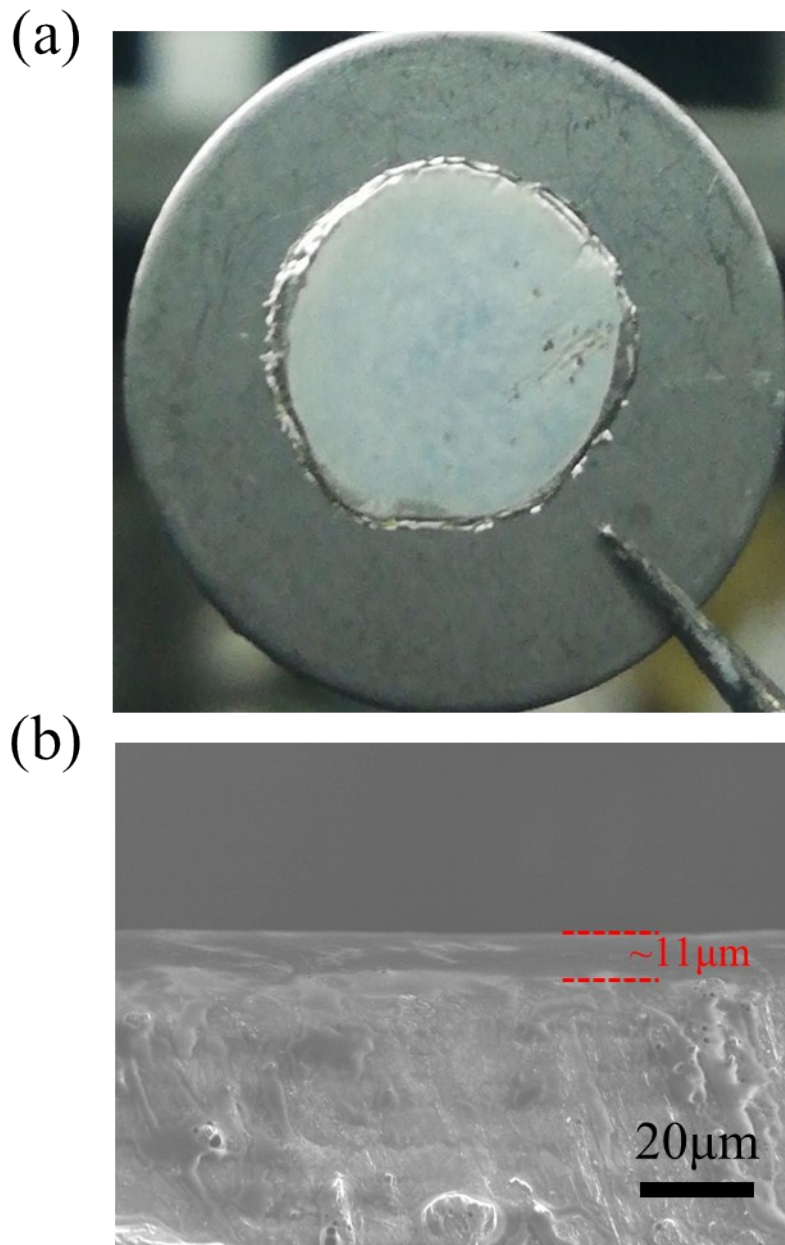

**Fig. S1** (a) Photograph of  $\text{TiO}_2/\text{ROLi-Li}$  electrode on top view. (b) Cross-sectional SEM image of the  $\text{TiO}_2/\text{ROLi-Li}$  electrode.

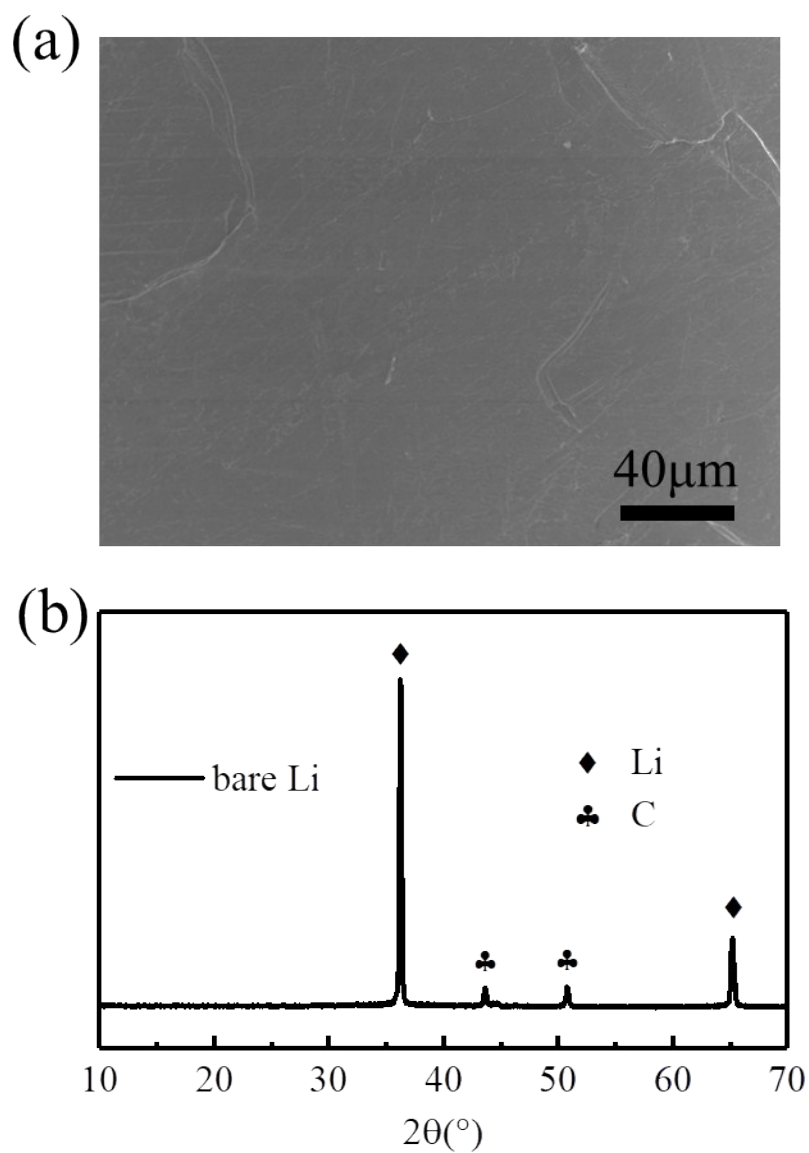

**Fig. S2** (a) Top view of the bare Li electrode. (b) XRD pattern of the bare Li electrode.

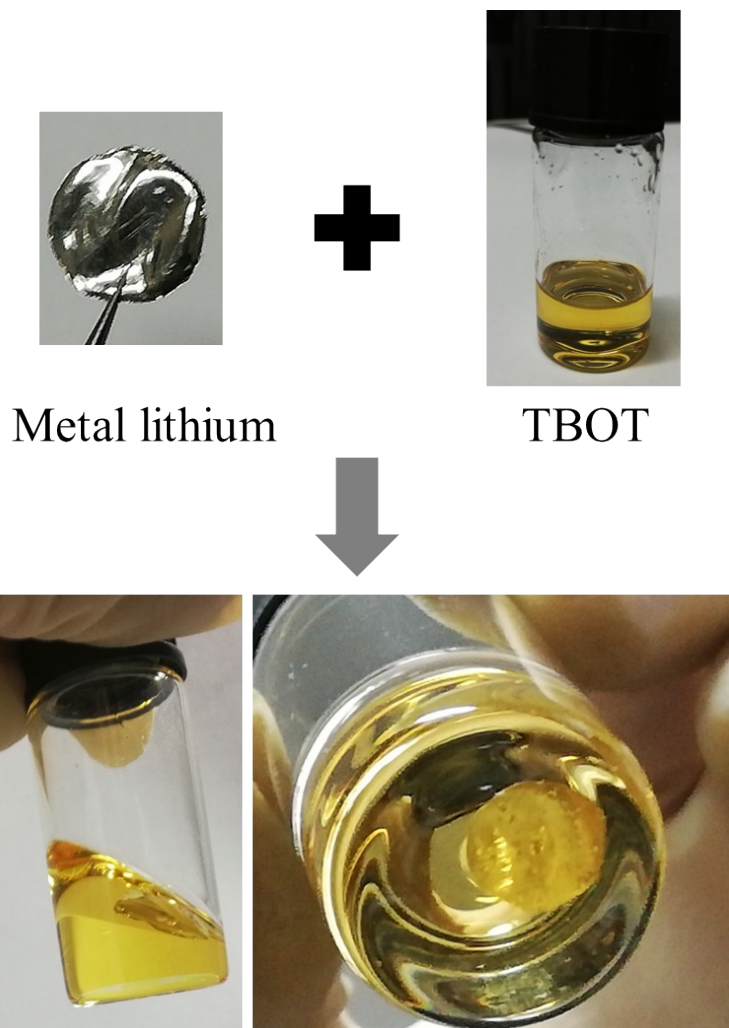

Metal lithium

TBOT

**Fig. S3** Phenomenons of the chemical reactions between lithium and TBOT. Bubbles were hydrogen generated from the reaction between  $H_2O$  and lithium.

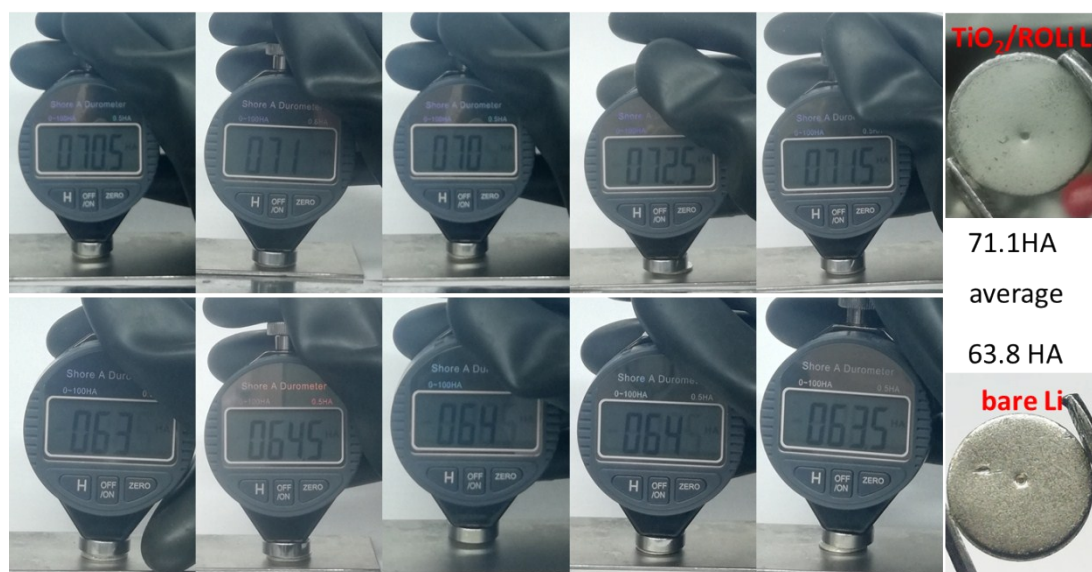

**Fig. S4** Hardness measurement results of the  $TiO_2/ROLi-Li$  and bare Li electrode with a Shore A

durometer.

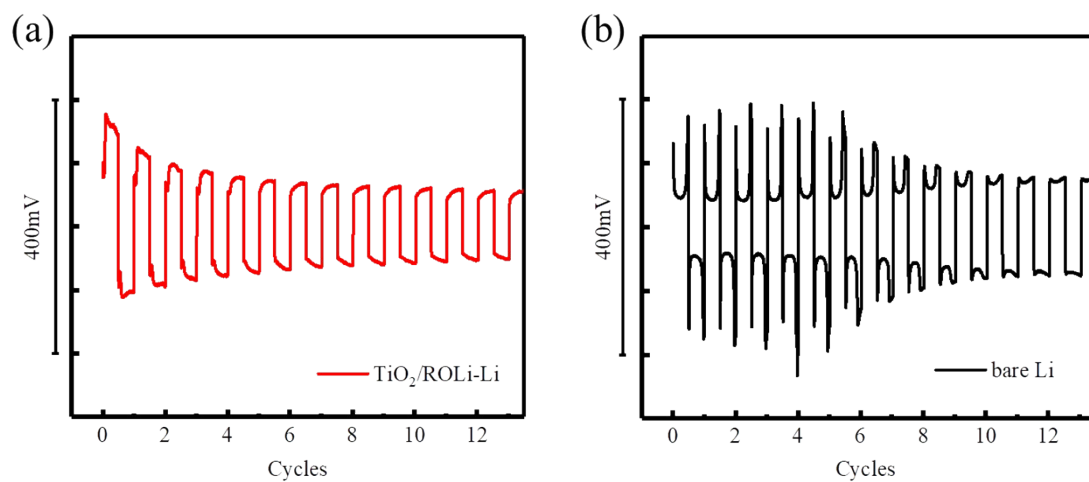

**Fig. S5** Electrochemical performances of symmetric cells with (a)  $\text{TiO}_2/\text{ROLi-Li}$  and (b) bare Li electrodes achieved at initial state.

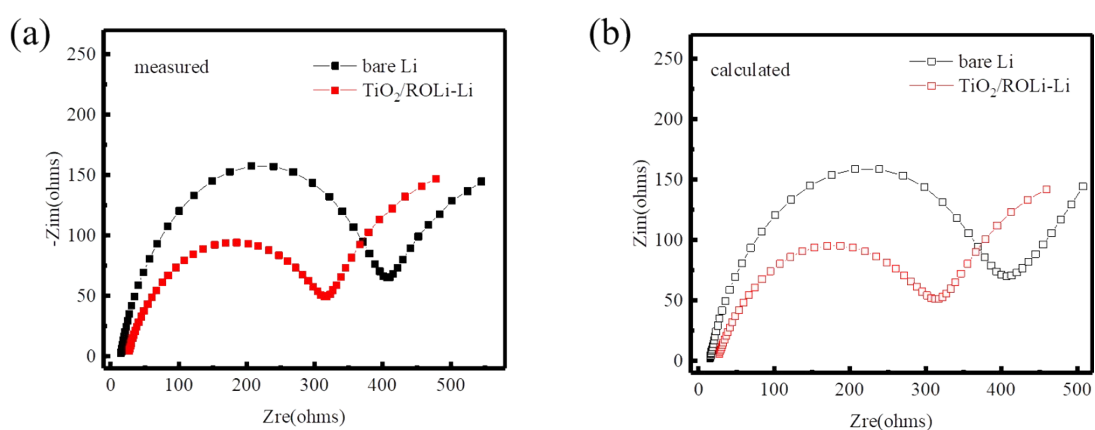

**Fig. S6** Nyquist plots (a) measured and (b) calculated of the  $\text{TiO}_2/\text{ROLi-Li}$  and bare Li electrode symmetric cells without cycling.

**Tab. S1** EIS calculation results for the  $\text{TiO}_2/\text{ROLi-Li}$  and bare Li electrode symmetric cells without cycling.

| ( $\Omega$ )                  | $R_L$ | $R_{\text{SEI}}$ | $R_{\text{ct}}$ | $R_e = R_{\text{SEI}} + R_{\text{ct}}$ |
|-------------------------------|-------|------------------|-----------------|----------------------------------------|
| bare Li                       | 14.27 | 162.40           | 190.00          | 352.40                                 |
| $\text{TiO}_2/\text{ROLi-Li}$ | 24.16 | 95.20            | 170.30          | 265.50                                 |

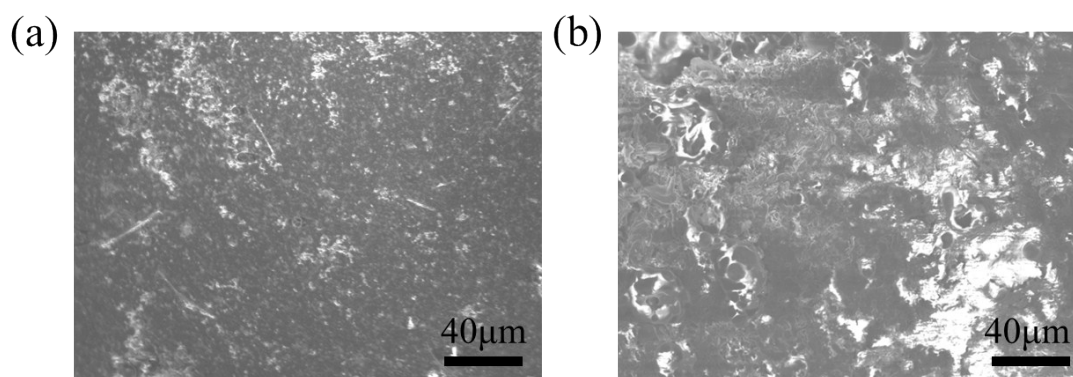

**Fig. S7** Surface images of (a) the  $\text{TiO}_2/\text{ROLi-Li}$  and (b) the bare Li electrodes after 30 cycles.

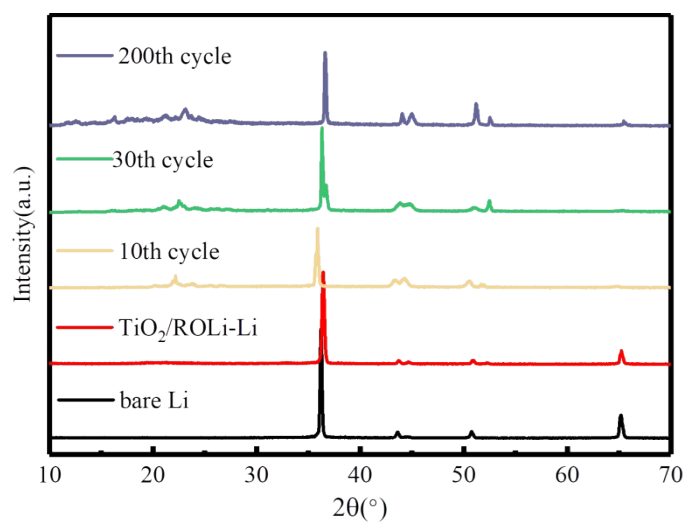

**Fig. S8** XRD patterns of the bare Li electrode and the symmetrical cells with the  $\text{TiO}_2/\text{ROLi-Li}$  electrode after 0, 10, 30, 300 cycles at a current density of  $1 \text{ mA cm}^{-2}$  and a capacity of  $1 \text{ mA h cm}^{-2}$ .

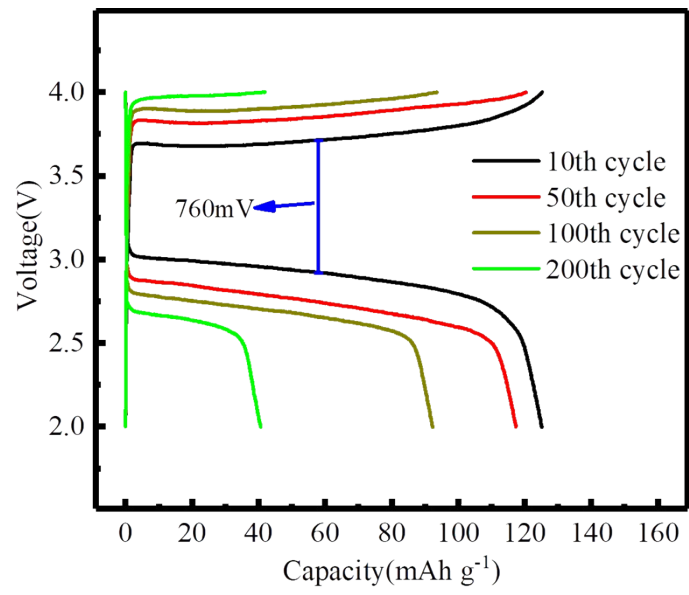

**Fig. S9** Discharge/charge curves of bare Li-LiFePO<sub>4</sub> full cell at 0.5C.
